# Supplementary material for: A longitudinal study on the association between quick returns and occupational accidents
Source: PubMed Central journal article supplement (PMC7737807; doi:10.5271/sjweh.3906), 2020-10-30
Supplement: SJWEH-46-645-S001.pdf [file SJWEH-46-645-S001.pdf]

# A longitudinal study on the association between quick returns and occupational accidents<sup>1</sup>

by Øystein Vedaa, PhD,<sup>2</sup> Anette Harris, PhD, Siri Waage, PhD, Bjørn Bjorvatn, PhD, Eirunn Thun, PhD, Hogne Vikanes Buchvold, PhD, Ingebjørg Louise Rockwell Djupedal, MA, Ståle Pallesen, PhD

1. Supplementary tables

2. Correspondence to: Øystein Vedaa Ph.D., Department of Health Promotion, Norwegian Institute of Public Health, Zander Kaaes gate 7, 5018 Bergen, Norway. [E-mail: oystein.vedaa@fhi.no].

**Table S1.** Descriptive statistics of occupational accidents across subgroups

|                                                                   | No QRs at baseline |                             |                          |                 | Moderate number of QRs at baseline |                             |                          |                 | High number of QRs at baseline |                             |                          |                 |
|-------------------------------------------------------------------|--------------------|-----------------------------|--------------------------|-----------------|------------------------------------|-----------------------------|--------------------------|-----------------|--------------------------------|-----------------------------|--------------------------|-----------------|
|                                                                   | <i>n</i>           | Mean (SD) num. of accidents | Median num. of accidents | Range accidents | <i>n</i>                           | Mean (SD) num. of accidents | Median num. of accidents | Range accidents | <i>n</i>                       | Mean (SD) num. of accidents | Median num. of accidents | Range accidents |
| Caused harm to oneself the last year (num. of incidences)         |                    |                             |                          |                 |                                    |                             |                          |                 |                                |                             |                          |                 |
| No change in QRs <sup>1</sup>                                     | 345                | 0.05 (0.28)                 | .00                      | 0-2             | 120                                | 0.03 (0.22)                 | .00                      | 0-2             | 64                             | 0.28 (0.97)                 | .00                      | 0-5             |
| Reduction in QRs                                                  | 0                  | -                           | -                        | -               | 164                                | 0.02 (0.15)                 | .00                      | 0-1             | 271                            | 0.08 (0.36)                 | .00                      | 0-3             |
| Increase in QRs                                                   | 70                 | 0.09 (0.33)                 | .00                      | 0-2             | 148                                | 0.08 (0.43)                 | .00                      | 0-4             | 102                            | 0.29 (0.82)                 | .00                      | 0-5             |
| Caused harm to patients/others the last year (num. of incidences) |                    |                             |                          |                 |                                    |                             |                          |                 |                                |                             |                          |                 |
| No change in QRs <sup>1</sup>                                     | 345                | 0.06 (0.57)                 | .00                      | 0-10            | 120                                | 0.03 (0.22)                 | .00                      | 0-2             | 64                             | 0.25 (1.29)                 | .00                      | 0-10            |
| Reduction in QRs                                                  | 0                  | -                           | -                        | -               | 164                                | 0.02 (0.17)                 | .00                      | 0-2             | 271                            | 0.07 (0.33)                 | .00                      | 0-3             |
| Increase in QRs                                                   | 70                 | 0.20 (0.79)                 | .00                      | 0-6             | 148                                | 0.29 (1.13)                 | .00                      | 0-10            | 102                            | 0.19 (0.64)                 | .00                      | 0-5             |
| Caused harm to equipment the last year (num. of incidences)       |                    |                             |                          |                 |                                    |                             |                          |                 |                                |                             |                          |                 |
| No change in QRs <sup>1</sup>                                     | 345                | 0.06 (0.33)                 | .00                      | 0-3             | 120                                | 0.05 (0.29)                 | .00                      | 0-2             | 64                             | 0.31 (1.34)                 | .00                      | 0-10            |
| Reduction in QRs                                                  | 0                  | -                           | -                        | -               | 164                                | 0.08 (0.47)                 | .00                      | 0-5             | 271                            | 0.17 (0.82)                 | .00                      | 0-10            |
| Increase in QRs                                                   | 70                 | 0.46 (1.95)                 | .00                      | 0-15            | 148                                | 0.24 (0.69)                 | .00                      | 0-5             | 102                            | 0.25 (1.15)                 | .00                      | 0-10            |

*Note.* The no QRs group includes those who had no QRs at baseline (in 2016). The moderate group includes the first half of those who had QRs at baseline (1-34 QRs the past year). The high group includes the second half of those who had QRs at baseline (>34 QRs the past year). Statistical significance ( $p < .05$ ) is indicated with estimates highlighted in bold.

<sup>1</sup> The no change in QRs category includes those who had an equal number of QRs (+/- 4) in 2016 and 2018.

**Table S2.** Results from the negative binomial regression analyses on the association between changes in number of quick returns (QRs) over time and occupational accidents

|                                                                   | No QRs at baseline |                 |                                 | Moderate number of QRs at baseline |                 |                                 | High number of QRs at baseline |                 |                                 |
|-------------------------------------------------------------------|--------------------|-----------------|---------------------------------|------------------------------------|-----------------|---------------------------------|--------------------------------|-----------------|---------------------------------|
|                                                                   | <i>n</i>           | Crude log count | Adjusted <sup>1</sup> log count | <i>n</i>                           | Crude log count | Adjusted <sup>1</sup> log count | <i>n</i>                       | Crude log count | Adjusted <sup>1</sup> log count |
| Caused harm to oneself the last year (num. of incidences)         |                    |                 |                                 |                                    |                 |                                 |                                |                 |                                 |
| No change in QRs (ref.) <sup>2</sup>                              | 345                |                 |                                 | 120                                |                 |                                 | 64                             |                 |                                 |
| Reduction in QRs                                                  | 0                  |                 |                                 | 164                                | -0.31           | -0.14                           | 271                            | <b>-1.25</b>    | <b>-1.06</b>                    |
| Increase in QRs                                                   | 70                 | 0.50            | 0.48                            | 148                                | 0.89            | 0.94                            | 102                            | 0.04            | 0.15                            |
| Caused harm to patients/others the last year (num. of incidences) |                    |                 |                                 |                                    |                 |                                 |                                |                 |                                 |
| No change in QRs (ref.) <sup>2</sup>                              | 345                |                 |                                 | 120                                |                 |                                 | 64                             |                 |                                 |
| Reduction in QRs                                                  | 0                  |                 |                                 | 164                                | -0.60           | -0.48                           | 271                            | <b>-1.22</b>    | <b>-1.32</b>                    |
| Increase in QRs                                                   | 70                 | <b>1.24</b>     | <b>1.80</b>                     | 148                                | <b>2.17</b>     | <b>2.14</b>                     | 102                            | -0.29           | -0.39                           |
| Caused harm to equipment the last year (num. of incidences)       |                    |                 |                                 |                                    |                 |                                 |                                |                 |                                 |
| No change in QRs (ref.) <sup>2</sup>                              | 345                |                 |                                 | 120                                |                 |                                 | 64                             |                 |                                 |
| Reduction in QRs                                                  | 0                  |                 |                                 | 164                                | 0.46            | -0.59                           | 271                            | -0.59           | 0.04                            |
| Increase in QRs                                                   | 70                 | <b>2.12</b>     | <b>1.48</b>                     | 148                                | <b>1.55</b>     | <b>1.06</b>                     | 102                            | -0.21           | 0.43                            |

*Note.* The no QRs group includes those who had no QRs at baseline (in 2016). The moderate group includes the first half of those who had QRs at baseline (1-34 QRs the past year). The high group includes the second half of those who had QRs at baseline (>34 QRs the past year). Statistical significance (p<.05) is indicated with estimates highlighted in bold.

<sup>1</sup> Adjusting for sex, age, relationship status, having children in the household, percentage of full time equivalent (FTE), number of night shifts the past year as measured in 2018, and corresponding number of accidents at baseline (in 2016).

<sup>2</sup> The no change in QRs category includes those who had an equal number of QRs (+- 4) in 2016 and 2018.
